# Supplementary material for: In Vivo and In Vitro Characterization of the Recently Emergent PRRSV 1-4-4 L1C Variant (L1C.5) in Comparison with Other PRRSV-2 Lineage 1 Isolates
Source: MDPI journal article supplement (doi:10.3390/v15112233), 2023-11-09
Supplement: s1 [file s1]

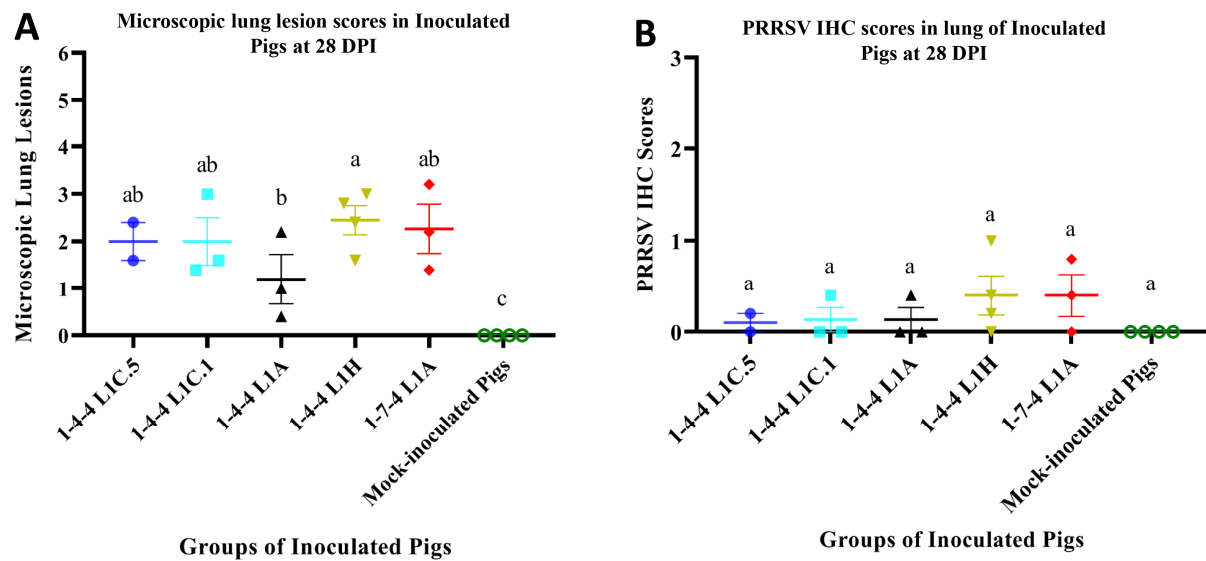

**Supplemental Figure S1.** Microscopic lesions, and PRRSV immunohistochemistry (IHC) scores in lung tissues of inoculated pigs at 28 DPI. (A) Microscopic lung lesion scores (in the range of 0–6) in inoculated pigs at 28 DPI. (B) PRRSV IHC staining scores (in the range of 0–3) in lung tissues of inoculated pigs at 28 DPI. A cluster graph was used to present the data with standard error of the mean. The statistical analysis was conducted between groups, with significance denoted by letters on the individual plot. Labels with different letters indicate significant differences; for example, a and b have a significant difference, but a and ab have no significant difference.



**Supplemental Table S1.** Nucleotide and amino acid identities between the 1-4-4 L1C.5 isolate MN/01775GA/2021 and other PRRSV isolates

| ORF          | Protein | Nucleotide identity % (amino acid identity %) compared to 1-4-4 L1C.5 isolate USA/MN/01775GA/2021 |                                   |                            |                              |                                 |
|--------------|---------|---------------------------------------------------------------------------------------------------|-----------------------------------|----------------------------|------------------------------|---------------------------------|
|              |         | 2-5-2 L5A (VR-2332)                                                                               | 1-4-4 L1C.1 (USA/NE/05828-3/2020) | 1-4-4 L1A (USA/85099/2018) | 1-4-4 L1H (USA/81793-6/2019) | 1-7-4 L1A (USA/IN/65239GA/2014) |
| Whole genome | N.A.    | 85.4% (N.A.)                                                                                      | 86.4% (N.A.)                      | 89.3% (N.A.)               | 83.5% (N.A.)                 | 89.1% (N.A.)                    |
| 5' UTR       | N.A.    | 93.6% (N.A.)                                                                                      | 89.8% (N.A.)                      | 95.2% (N.A.)               | 90.9% (N.A.)                 | 95.7% (N.A.)                    |
| ORF1a        | pp1a    | 83.8% (83.1%)                                                                                     | 81.5% (82.2%)                     | 86.8% (88.6%)              | 79.7% (81.0%)                | 88.1% (89.9%)                   |
| ORF1b        | N.A.    | 86.4% (N.A.)                                                                                      | 90.9% (N.A.)                      | 89.7% (N.A.)               | 87.5% (N.A.)                 | 90.9% (N.A.)                    |
| ORF1a/b      | pp1ab   | N.A. (87.8%)                                                                                      | N.A. (88.1%)                      | N.A. (91.7%)               | N.A. (86.7%)                 | N.A. (93.0%)                    |
|              | nsp1    | 83.3% (85.6%)                                                                                     | 83.4% (84.8%)                     | 88.9% (89.8%)              | 83.9% (85.1%)                | 91.0% (91.1%)                   |
|              | nsp2    | 79.7% (73.6%)                                                                                     | 78.6% (74.7%)                     | 86.7% (85.3%)              | 76.1% (72.4%)                | 88.3% (87.2%)                   |
|              | nsp3    | 86.8% (94.8%)                                                                                     | 81.6% (90.4%)                     | 86.9% (93.5%)              | 83.5% (92.6%)                | 87.5% (93.9%)                   |
|              | nsp4    | 92.0% (94.6%)                                                                                     | 81.4% (90.7%)                     | 82.5% (91.2%)              | 80.4% (91.2%)                | 83.0% (91.7%)                   |
|              | nsp5    | 98.9% (95.3%)                                                                                     | 81.4% (84.7%)                     | 82.5% (87.6%)              | 80.0% (85.9%)                | 84.3% (89.4%)                   |
|              | nsp6    | 93.7% (100%)                                                                                      | 87.5% (100%)                      | 91.6% (100%)               | 85.4% (100%)                 | 89.6% (93.7%)                   |
|              | nsp7    | 82.2% (88.0%)                                                                                     | 87.6% (89.9%)                     | 88.1% (91.9%)              | 81.3% (85.3%)                | 88.7% (92.6%)                   |
|              | nsp8    | 89.6% (91.1%)                                                                                     | 94.1% (93.3%)                     | 94.8% (97.8%)              | 91.1% (91.1%)                | 94.8% (97.8%)                   |
|              | nsp9    | 88.0% (96.3%)                                                                                     | 90.1% (96.9%)                     | 89.3% (96.8%)              | 87.2% (96.0%)                | 90.4% (97.8%)                   |
|              | nsp10   | 85.6% (95.2%)                                                                                     | 90.2% (97.7%)                     | 89.1% (97.7%)              | 90.8% (97.0%)                | 90.2% (98.2%)                   |
|              | nsp11   | 85.3% (94.1%)                                                                                     | 93.3% (96.8%)                     | 89.8% (94.6%)              | 84.3% (93.3%)                | 92.4% (96.8%)                   |
|              | nsp12   | 84.1% (91.5%)                                                                                     | 94.3% (98.0%)                     | 94.5% (96.7%)              | 84.5% (92.8%)                | 93.9% (98.7%)                   |
| ORF2a        | GP2     | 87.5% (85.9%)                                                                                     | 83.4% (82.8%)                     | 94.9% (94.9%)              | 83.2% (81.6%)                | 84.2% (80.1%)                   |
| ORF2b        | E       | 89.2% (87.7%)                                                                                     | 88.3% (91.8%)                     | 97.3% (97.2%)              | 86.0% (89.0%)                | 86.9% (86.3%)                   |
| ORF3         | GP3     | 83.5% (81.1%)                                                                                     | 85.5% (82.7%)                     | 94.2% (91.7%)              | 81.7% (79.1%)                | 81.8% (79.1%)                   |
| ORF4         | GP4     | 86.0% (85.9%)                                                                                     | 93.6% (92.7%)                     | 95.9% (94.4%)              | 88.8% (88.2%)                | 88.1% (88.2%)                   |
| ORF5a        | GP5a    | 90.1% (91.3%)                                                                                     | 91.5% (93.5%)                     | 95.0% (93.5%)              | 92.2% (91.3%)                | 92.2% (95.6%)                   |
| ORF5         | GP5     | 86.4% (85.0%)                                                                                     | 92.4% (91.0%)                     | 88.4% (92.5%)              | 86.2% (93.0%)                | 87.9% (90.0%)                   |
| ORF6         | M       | 89.3% (93.1%)                                                                                     | 96.2% (97.1%)                     | 93.9% (94.2%)              | 88.6% (94.8%)                | 94.1% (94.8%)                   |
| ORF7         | N       | 89.2% (91.9%)                                                                                     | 94.3% (95.1)                      | 95.4% (96.7%)              | 85.7% (87.0%)                | 96.5% (97.5%)                   |
| 3' UTR       | N.A.    | 93.6% (N.A.)                                                                                      | 94.3% (N.A.)                      | 96.4% (N.A.)               | 96.4% (N.A.)                 | 97.1% (N.A.)                    |

N.A. – Not applicable
